# Supplementary material for: Neurodynamic Treatment Promotes Mechanical Pain Modulation in Sensory Neurons and Nerve Regeneration in Rats
Source: MDPI journal article supplement (doi:10.3390/biomedicines10061296), 2022-05-31
Supplement: s1 [file s1]

**Table S1.** Baseline values of animal sensory and motor profiles.

|                                                                  | Sensory Assessment |             |                  |       |       |            |          |
|------------------------------------------------------------------|--------------------|-------------|------------------|-------|-------|------------|----------|
|                                                                  | NO NDT             | NDT POST    | NDT PRE-<br>POST | df    | F     | $\eta^2_p$ | <i>p</i> |
| <i>Mechanical pain threshold injured side (g)</i>                | 20.8 ± 2.04        | 17.5 ± 4.18 | 18.3 ± 4.08      | 2, 15 | 1.413 | 0.159      | 0.274    |
| <i>Mechanical pain threshold not injured side (g)</i>            | 18.3 ± 4.08        | 20 ± 8.94   | 19.2 ± 4.92      | 2, 15 | 0.103 | 0.014      | 0.902    |
| <i>Touch threshold injured side (g)</i>                          | 15 ± 0             | 13.3 ± 2.58 | 15 ± 3.16        | 2, 15 | 1     | 0.118      | 0.391    |
| <i>Touch threshold not injured side (g)</i>                      | 15 ± 0             | 13.3 ± 2.58 | 14.2 ± 2.04      | 2, 15 | 1.154 | 0.133      | 0.342    |
| <i>Pain behaviour to noxious stimuli</i>                         | 2 ± 0              | 2 ± 0       | 2.17 ± 0.408     | 2, 15 | 1     | 0.118      | 0.391    |
| <i>Number of paw withdrawals on 30 repeated nerve tensioning</i> | 1.83 ± 1.84        | 3.33 ± 3.08 | 3.67 ± 2.58      | 2, 15 | 0.88  | 0.105      | 0.435    |
| <b>Motor Assessment</b>                                          |                    |             |                  |       |       |            |          |
| <i>Grissini test speed (s)</i>                                   | 66.5 ± 11.8        | 76.3 ± 12.5 | 86.3 ± 10.9 *    | 2, 15 | 4.247 | 0.362      | 0.035    |
| <i>Grissini test number of adjustments</i>                       | 48.3 ± 14.0        | 41 ± 9.84   | 48.3 ± 9.81      | 2, 15 | 0.83  | 0.1        | 0.455    |
| <i>Grasping test (g)</i>                                         | 617 ± 39.5         | 614 ± 94.1  | 613 ± 87.1       | 2, 15 | 0.004 | 0.0005     | 0.996    |
| <i>Rope test (s)</i>                                             | 57.8 ± 25.2        | 32.2 ± 13.3 | 42.3 ± 31.2      | 2, 15 | 1.684 | 0.183      | 0.219    |
| <i>Animal weight (g)</i>                                         | 238 ± 9.56         | 237 ± 5.88  | 239 ± 6.43       | 2, 15 | 0.079 | 0.01       | 0.925    |

**Table S2.** ANOVA for repeated measures results from behavioural assays ( $\eta^2_p$ : partial eta squared).

| <b>Sensory Assays</b>                                 |                  |                |            |                  |               |            |                         |               |              |
|-------------------------------------------------------|------------------|----------------|------------|------------------|---------------|------------|-------------------------|---------------|--------------|
|                                                       | <u>Time</u>      |                |            | <u>Treatment</u> |               |            | <u>Time x Treatment</u> |               |              |
| <u>Variable</u>                                       | F                | p              | $\eta^2_p$ | F                | p             | $\eta^2_p$ | F                       | p             | $\eta^2_p$   |
| <i>Mechanical pain threshold injured side (g)</i>     | 68.971           | <b>0.0000</b>  | 0.798      | 12.357           | <b>0.0000</b> | 0.191      | 8.918                   | <b>0.0000</b> | 0.505        |
| <i>Touch threshold injured side (g)</i>               | 5.23             | <b>0.0001</b>  | 0.23       | 8.016            | <b>0.0006</b> | 0.132      | 1.131                   | 0.343         | 0.114        |
| <i>Mechanical pain threshold not injured side (g)</i> | 2.274            | 0.042          | 0.115      | 1.553            | 0.216         | 0.029      | 0.797                   | 0.652         | 0.084        |
| <i>Touch threshold not injured side (g)</i>           | 5.481            | <b>0.0001</b>  | 0.238      | 5.547            | <b>0.005</b>  | 0.096      | 0.73                    | 0.72          | 0.077        |
| <i>Pain behaviour to noxious stimuli</i>              | 43.333           | <b>0.0000</b>  | 0.712      | 3.9              | <b>0.023</b>  | 0.069      | 5.533                   | <b>0.0000</b> | <b>0.387</b> |
| <b>Motor Assays</b>                                   |                  |                |            |                  |               |            |                         |               |              |
| <i>Grissini test speed (sec)</i>                      | 2.405            | <b>0.043</b>   | 0.12       | 5.081            | <b>0.008</b>  | 0.104      | 0.637                   | 0.779         | 0.067        |
| <i>Grissini test number of adjustments</i>            | 3.0020           | <b>0.015</b>   | 0.147      | 2.817            | 0.065         | 0.06       | 1.651                   | 0.105         | 0.158        |
| <i>Grasping test (g)</i>                              | 300.04           | <b>0.000</b>   | 0.945      | 0.729            | 0.485         | 0.014      | 0.858                   | 0.591         | 0.089        |
| <i>Rope test (sec)</i>                                | 1.7638           | 0.114          | 0.092      | 8.3343           | <b>0.0004</b> | 0.137      | 0.8732                  | 0.576         | 0.091        |
| <i>Animal weight (g)</i>                              | 23.395           | <b>0.0000</b>  | 0.51       | 1.778            | 0.181         | 0.073      | 0.522                   | 0.720         | 0.044        |
|                                                       | <u>Treatment</u> |                |            | <u>Side</u>      |               |            | <u>Treatment x Side</u> |               |              |
| <i>Wet muscle weight (g)</i>                          | 10.309           | <b>0.00039</b> | 0.407      | 157.012          | <b>0.0000</b> | 0.84       | 1.023                   | 0.372         | 0.064        |

**Table S3.** Morphological characteristics of DRG explants.

|                        | CTR IN         | CTR OUT         | NDT            | F [df]      | 95% CI         | p     |
|------------------------|----------------|-----------------|----------------|-------------|----------------|-------|
| Dmax ( $\mu\text{m}$ ) | 1552 $\pm$ 447 | 1465 $\pm$ 368  | 2200 $\pm$ 524 | 7.92 [2,27] | 234.85–1235.14 | 0.003 |
| Nmax                   | 188 $\pm$ 92.1 | 94.2 $\pm$ 89.6 | 153 $\pm$ 69.5 | 3.15 [2,27] | 131.74–243.46  | 0.06  |
| Sholl Critical Value   | 148 $\pm$ 267  | 160 $\pm$ 137   | 278 $\pm$ 323  | 0.79 [2,27] | –19.96–314.96  | 0.46  |
